# Supplementary material for: Control of Taenia solium; A Case for Public and Private Sector Investment
Source: Front Vet Sci. 2019 Jun 20;6:176. doi: 10.3389/fvets.2019.00176 (PMC6595182; doi:10.3389/fvets.2019.00176)
Supplement: Supplementary Material S1 — Adapted food chain risk model. Available online at: https://figshare.com/s/42e6a65deaafc72e1cb6. [file Table_1.xlsx]

## Sheet: RiskSerializationData
6	0
0
0.00422134	TRUE	0	1	GF1_rK0qDwEAEAAYAQwjACYAOgBuAIIAgwCRALQA8gAUAQ4BKgD//wAAAAAAAQQAAAAABjAuMDAwMAAAAAEuUmlzayB0aGF0IHBvcmsgbWVhbCBpcyBpbmZlY3RpdmUgYWZ0ZXIgY29va2luZwEAAQEQAAIAAQpTdGF0aXN0aWNzAwEBAP8BAQEBAQABAQEABAAAAAEBAQEBAAEAAAAAAAAAAAAAAAAAAKBmQAEFAAAAAQAEAAAAAbgAAjYALlJpc2sgdGhhdCBwb3JrIG1lYWwgaXMgaW5mZWN0aXZlIGFmdGVyIGNvb2tpbmcAAC8BAAIAAgD6AAQBAQECAYAUrkfhenQ/AADXo3A9CtfvPwAABQABAQEAAQEBAA==	1	0	0		>75%	<25%	>90%																					0.00422134	1	1	FALSE	TRUE	0	FALSE	#NAME?
16196	TRUE	0	1	GF1_rK0qDwEAEAAZAQwjACYAOgB5AI0AjgCcAKoA8wAVAQ8BKgD//wAAAAAAAQQAAAAABjAuMDAwMAAAAAE5bnVtYmVyIG9mIHBvdGVudGlhbGx5IGluZmVjdGl2ZSBwb3JrIG1lYWxzIHRha2VuIHBlciB5ZWFyAQABARAAAgABClN0YXRpc3RpY3MDAQEA/wEBAQEBAAEBAQAEAAAAAQEBAQEAAQEBAAQAAAABrgACQQA5bnVtYmVyIG9mIHBvdGVudGlhbGx5IGluZmVjdGl2ZSBwb3JrIG1lYWxzIHRha2VuIHBlciB5ZWFyAAAvAQACAAIA+wAFAQEBAgGAFK5H4Xp0PwAA16NwPQrX7z8AAAUAAQEBAAEBAQA=	1	0	0		>75%	<25%	>90%																					16196	2	1	FALSE	TRUE	0	FALSE	#NAME?
6085.99	TRUE	0	1	GF1_rK0qDwEAEAALAQwjACYAOgByAIYAhwCVAKMA5QAHAQEBKgD//wAAAAAAAQQAAAAABjAuMDAwMAAAAAEycG90ZW50aWFsbHkgaW5mZWN0aXZlIGV2ZW50cyBhdm9pZGVkIGZyb20gYmFzZWxpbmUBAAEBEAACAAEKU3RhdGlzdGljcwMBAQD/AQEBAQEAAQEBAAQAAAABAQEBAQABAQEABAAAAAGnAAI6ADJwb3RlbnRpYWxseSBpbmZlY3RpdmUgZXZlbnRzIGF2b2lkZWQgZnJvbSBiYXNlbGluZQAALwEAAgACAO0A9wABAQIBgBSuR+F6dD8AANejcD0K1+8/AAAFAAEBAQABAQEA	1	0	0		>75%	<25%	>90%																					6085.99	3	1	FALSE	TRUE	0	FALSE	#NAME?
344862	TRUE	0	1	GF1_rK0qDwEAEADKAAwjACYAPQBTAGcAaAB2AIQApADGAMAAKgD//wAAAAAAAQQAAAAACTAuMDAwMDAwMAAAAAEQaW5jcmVtZW50YWwgY29zdAEAAQEQAAIAAQpTdGF0aXN0aWNzAwEBAP8BAQEBAQABAQEABAAAAAEBAQEBAAEBAQAEAAAAAYgAAhgAEGluY3JlbWVudGFsIGNvc3QAAC8BAAIAAgCsALYAAQECAYAUrkfhenQ/AADXo3A9CtfvPwAABQABAQEAAQEBAA==	1	0	0		>75%	<25%	>90%																					344862	6	1	FALSE	TRUE	0	FALSE	#NAME?
46.2033	TRUE	0	1	GF1_rK0qDwEAEACvAAwjACYAOgBEAFgAWQBnAHUAiQCrAKUAKgD//wAAAAAAAQQAAAAABjAuMDAwMAAAAAEESUNFUgEAAQEQAAIAAQpTdGF0aXN0aWNzAwEBAP8BAQEBAQABAQEABAAAAAEBAQEBAAEBAQAEAAAAAXkAAgwABElDRVIAAC8BAAIAAgCRAJsAAQECAYAUrkfhenQ/AADXo3A9CtfvPwAABQABAQEAAQEBAA==	1	0	0		>75%	<25%	>90%																					46.2033	7	1	FALSE	TRUE	0	FALSE	#NAME?
10871.6	TRUE	0	1	GF1_rK0qDwEAEADEAAwjACYANQBMAGAAYQBvAH0AngDAALoAKgD//wAAAAAAAQQAAAAAATAAAAABEWxvc3NlcyB0aHJvdWdoIE1JAQABARAAAgABClN0YXRpc3RpY3MDAQEA/wEBAQEBAAEBAQAEAAAAAQEBAQEAAQEBAAQAAAABgQACGQARbG9zc2VzIHRocm91Z2ggTUkAAC8BAAIAAgCmALAAAQECAYAUrkfhenQ/AADXo3A9CtfvPwAABQABAQEAAQEBAA==	1	0	0		>75%	<25%	>90%																					10871.6	12	1	FALSE	TRUE	0	FALSE	#NAME?
0
FALSE	15680	7345	3075	810
FALSE	15680	7345	13120	0
FALSE	15680	7345	13120	0
FALSE	15680	7345	13120	0
FALSE	15680	7345	13120	0
0
0	FALSE	FALSE	10	0.95	1

## Sheet: Input Results
	@RISK Input Results
	Performed By: Windows User
	Date: 13 December 2018 16:58:35
			Name	Worksheet	Cell	Graph	Min	Mean	Max	0.05	0.95	Errors
	Sup_Mat1_FCRA_131218.xlsx
		Category: <none>
			truncated infective events avoided	MODEL	B192		53.6098	8652	21383.6	2483.05	15754.2	0
			daily weight gain mutua 2012	costs	G3		80.4154	123.333	178.007	93.9279	155.443	0
			probability pig is slaughtered informally	Formal vs Informal Slaughter	F3		0.00207306	0.0601667	0.183158	0.014263	0.119873	0
			Risk of untreated pig being infected at formal slaughter	Prevalence of Cysticercosis	B3		0.241254	0.375833	0.509865	0.29031	0.461215	0
			Risk of pig being infected at informal slaughter	Prevalence of Cysticercosis	B6		0.240649	0.375833	0.509908	0.290311	0.461214	0
			mean number of cysts/ meal (light)	Level of Infection	E10		0.0044028	0.1122	0.219999	0.0151799	0.209218	0
			mean number of cysts/ meal (Mod)	Level of Infection	E11		0.226704	0.33555	0.444398	0.237584	0.433515	0
			mean number of cysts/ meal (Heavy)	Level of Infection	E12		0.4489	0.724445	0.999989	0.476439	0.972437	0
			mean number of cysts/ meal (v.Heavy)	Level of Infection	E13		1	1	1	1	1	0
			Probability any one cysticercus is viable	Level of Infection	E17		0.0100062	0.505	0.999987	0.0594971	0.950486	0
			Daily	Pork Eating Behaviour	B4		0.400986	0.766667	1.37217	0.495696	1.09152	0
			Weekly	Pork Eating Behaviour	C4		14.343	16.3333	18.4546	15.0424	17.6512	0
			Monthly	Pork Eating Behaviour	D4		35.5321	38.2	40.8577	36.5219	39.8779	0
			Yearly	Pork Eating Behaviour	E4		14.4376	16.4333	18.5544	15.1425	17.7511	0
			sp. Occasions	Pork Eating Behaviour	F4		3.51155	4.63333	5.87607	3.90239	5.39131	0
			Risk of pork meal being undercooked	Pork Eating Behaviour	I13		0.0504876	0.07085	0.0905407	0.0580807	0.0834961	0
			killout weight pig (g)	Pork Eating Behaviour	L20		18015.6	24333.3	37678.8	19349.2	30791.9	0
		Category: ADWG
			ADWG / g	pig weight	B3		80.5502	108.333	129.699	92.2763	123.036	0
		Category: global cost per MI
			global cost per MI / cost $	costs	B73		6407.35	7050	7887.2	6608.91	7531.65	0
		Category: pig infected/detected at meat inspection
			pig infected/detected at meat inspection / probability	Intervention Parameters	B2		0.103442	0.424667	0.886257	0.196397	0.683444	0
		Category: pig is heavily infected
			pig is heavily infected / probability	Level of Infection	C4		0.141998	0.395667	0.684037	0.228034	0.570322	0
			pig is heavily infected / cysts/pig	Level of Infection	D4		101	300.5	499.993	120.947	480.042	0
		Category: pig is lightly infected
			pig is lightly infected / probability	Level of Infection	C2		0.207193	0.485333	0.764234	0.310613	0.661126	0
			pig is lightly infected / cysts/pig	Level of Infection	D2		1.00002	25.5	49.9995	3.44958	47.5499	0
		Category: pig is moderately infected
			pig is moderately infected / probability	Level of Infection	C3		0.0011756	0.0983333	0.313238	0.0196413	0.204143	0
			pig is moderately infected / cysts/pig	Level of Infection	D3		51.0003	75.5	99.9998	53.45	97.5497	0
		Category: pig uninfected/escapes detection at meat inspection
			pig uninfected/escapes detection at meat inspection / probability	Intervention Parameters	B5		0.909665	0.983333	1	0.954927	0.998979	0
		Category: Probability of treated pig being uninfected
			Probability of treated pig being uninfected / probability	Intervention Parameters	B10		0.990834	0.998333	1	0.995493	0.999898	0
		Category: Probability of treatment
			Probability of treatment / probability	Intervention Parameters	B8					n/a	n/a	50000
		Category: probabily pig is v.heavily infected
			probabily pig is v.heavily infected / probability	Level of Infection	C5		0.00109045	0.0983334	0.319344	0.0196436	0.204142	0
			probabily pig is v.heavily infected / cysts/pig	Level of Infection	D5		502.005	40420.5	80338.9	4491.8	76346.7	0
		Category: Travel to pig
			Travel to pig / daily weight gain mutua 2012	costs	G12		0.0900907	0.115	0.139908	0.0967664	0.133232	0
	Supplementary_material_1_risk_analysis_model_@risk_Baseline.xlsx
		Category: <none>
			probability pig is slaughtered informally	Formal vs Informal Slaughter	F3		0.00207834	0.0601667	0.179118	0.0142643	0.119871	0
			Risk of pig being infected at formal slaughter	Prevalence of Cysticercosis	B3		0.240358	0.375833	0.509677	0.290307	0.461215	0
			Risk of pig being infected at informal slaughter	Prevalence of Cysticercosis	B6		0.240778	0.375833	0.51182	0.290306	0.461218	0
			mean number of cysts/ meal (light)	Level of Infection	E10		0.0044034	0.1122	0.219997	0.0151789	0.209216	0
			mean number of cysts/ meal (Mod)	Level of Infection	E11		0.226701	0.33555	0.444398	0.237584	0.433511	0
			mean number of cysts/ meal (Heavy)	Level of Infection	E12		0.448898	0.724445	0.999998	0.476437	0.972436	0
			mean number of cysts/ meal (v.Heavy)	Level of Infection	E13		1	1	1	1	1	0
			Probability any one cysticercus is viable	Level of Infection	E17		0.0100119	0.505	0.999987	0.0594846	0.950482	0
			Risk of pork meal being undercooked	Pork Eating Behaviour	I13		0.0505104	0.07085	0.090802	0.05808	0.0834964	0
		Category: pig infected/detected at meat inspection
			pig infected/detected at meat inspection / probability	Intervention Parameters	B2		1.25067e-08	0.0113333	0.0624838	0.00069394	0.0306489	0
		Category: pig is heavily infected
			pig is heavily infected / probability	Level of Infection	C4		0.141949	0.395667	0.679958	0.228038	0.570321	0
			pig is heavily infected / cysts/pig	Level of Infection	D4		101.004	300.5	499.993	120.942	480.049	0
		Category: pig is lightly infected
			pig is lightly infected / probability	Level of Infection	C2		0.212652	0.485333	0.76463	0.310618	0.661122	0
			pig is lightly infected / cysts/pig	Level of Infection	D2		1.00077	25.5	49.9995	3.44942	47.5495	0
		Category: pig is moderately infected
			pig is moderately infected / probability	Level of Infection	C3		0.00106504	0.0983333	0.313929	0.019642	0.204151	0
			pig is moderately infected / cysts/pig	Level of Infection	D3		51.0003	75.5	99.9993	53.4496	97.5495	0
		Category: pig uninfected/detected at meat inspection
			pig uninfected/detected at meat inspection / probability	Intervention Parameters	B4		2.07818e-08	0.00799998	0.0426442	0.000489711	0.021633	0
		Category: probabily pig is v.heavily infected
			probabily pig is v.heavily infected / probability	Level of Infection	C5		0.00112442	0.0983333	0.314279	0.0196414	0.204143	0
			probabily pig is v.heavily infected / cysts/pig	Level of Infection	D5		501.16	40420.5	80339	4492.14	76347.6	0

## Sheet: Output Results
	@RISK Output Results
	Performed By: Windows User
	Date: 13 December 2018 16:58:45
		Status	Name	Worksheet	Cell	Graph	Min	Mean	Max	0.05	0.95	Errors
	Sup_Mat1_FCRA_131218.xlsx
		OK	Risk that pork meal is infective after cooking	MODEL	B186		2.25585e-05	0.00356591	0.0183927	0.000365104	0.0082135	0
		OK	number of potentially infective pork meals taken per year	MODEL	B190		72.174	14792.3	88927.1	1482.95	34946.4	0
		OK	potentially infective events avoided from baseline	MODEL	B191		-66645.1	7489.66	22209.8	-12671	20798.5	0
		OK	loss condemned pigs	MODEL	B194		35913.2	196145	504216	92566.3	322540	0
		OK	total cost treated pigs	MODEL	B196		0	0	0	0	0	0
		OK	incremental cost	MODEL	B204		188231	354680	666516	250136	481481	0
		0	ICER	MODEL	B206		-244787	839.751	40619270	-49.9751	88.6753	0
	Supplementary_material_1_risk_analysis_model_@risk_Baseline.xlsx
		OK	Risk that pork meal is infective before cooking	MODEL	B88		0.000922046	0.082192	0.312393	0.00901879	0.173401	0
		OK	Risk that pork meal is infective after cooking	MODEL	B90		5.81483e-05	0.00582711	0.0233243	0.000635965	0.012522	0
		OK	number of potentially infective pork meals taken per year	MODEL	B93		223.097	22356.9	89488.3	2440.01	48043.2	0
		OK		MODEL	B95		0.00159138	1389.29	20088	50.9755	4533.33	0
		OK	losses through MI	MODEL	B97		53.0869	10681.8	52043.8	2205.57	22935.7	0
