# Supplementary material for: Control of Taenia solium; A Case for Public and Private Sector Investment
Source: Front Vet Sci. 2019 Jun 20;6:176. doi: 10.3389/fvets.2019.00176 (PMC6595182; doi:10.3389/fvets.2019.00176)
Supplement: Supplementary Table 2 — Model inputs and outputs improved meat inspection and pharmacological inputs. [file Table_2.xlsx]

## Sheet: RiskSerializationData
6	0
0
0.00422134	TRUE	0	1	GF1_rK0qDwEAEAAYAQwjACYAOgBuAIIAgwCRALQA8gAUAQ4BKgD//wAAAAAAAQQAAAAABjAuMDAwMAAAAAEuUmlzayB0aGF0IHBvcmsgbWVhbCBpcyBpbmZlY3RpdmUgYWZ0ZXIgY29va2luZwEAAQEQAAIAAQpTdGF0aXN0aWNzAwEBAP8BAQEBAQABAQEABAAAAAEBAQEBAAEAAAAAAAAAAAAAAAAAAKBmQAEFAAAAAQAEAAAAAbgAAjYALlJpc2sgdGhhdCBwb3JrIG1lYWwgaXMgaW5mZWN0aXZlIGFmdGVyIGNvb2tpbmcAAC8BAAIAAgD6AAQBAQECAYAUrkfhenQ/AADXo3A9CtfvPwAABQABAQEAAQEBAA==	1	0	0		>75%	<25%	>90%																					0.00422134	1	1	FALSE	TRUE	0	FALSE	#NAME?
16196	TRUE	0	1	GF1_rK0qDwEAEAAZAQwjACYAOgB5AI0AjgCcAKoA8wAVAQ8BKgD//wAAAAAAAQQAAAAABjAuMDAwMAAAAAE5bnVtYmVyIG9mIHBvdGVudGlhbGx5IGluZmVjdGl2ZSBwb3JrIG1lYWxzIHRha2VuIHBlciB5ZWFyAQABARAAAgABClN0YXRpc3RpY3MDAQEA/wEBAQEBAAEBAQAEAAAAAQEBAQEAAQEBAAQAAAABrgACQQA5bnVtYmVyIG9mIHBvdGVudGlhbGx5IGluZmVjdGl2ZSBwb3JrIG1lYWxzIHRha2VuIHBlciB5ZWFyAAAvAQACAAIA+wAFAQEBAgGAFK5H4Xp0PwAA16NwPQrX7z8AAAUAAQEBAAEBAQA=	1	0	0		>75%	<25%	>90%																					16196	2	1	FALSE	TRUE	0	FALSE	#NAME?
6085.99	TRUE	0	1	GF1_rK0qDwEAEAALAQwjACYAOgByAIYAhwCVAKMA5QAHAQEBKgD//wAAAAAAAQQAAAAABjAuMDAwMAAAAAEycG90ZW50aWFsbHkgaW5mZWN0aXZlIGV2ZW50cyBhdm9pZGVkIGZyb20gYmFzZWxpbmUBAAEBEAACAAEKU3RhdGlzdGljcwMBAQD/AQEBAQEAAQEBAAQAAAABAQEBAQABAQEABAAAAAGnAAI6ADJwb3RlbnRpYWxseSBpbmZlY3RpdmUgZXZlbnRzIGF2b2lkZWQgZnJvbSBiYXNlbGluZQAALwEAAgACAO0A9wABAQIBgBSuR+F6dD8AANejcD0K1+8/AAAFAAEBAQABAQEA	1	0	0		>75%	<25%	>90%																					6085.99	3	1	FALSE	TRUE	0	FALSE	#NAME?
344862	TRUE	0	1	GF1_rK0qDwEAEADKAAwjACYAPQBTAGcAaAB2AIQApADGAMAAKgD//wAAAAAAAQQAAAAACTAuMDAwMDAwMAAAAAEQaW5jcmVtZW50YWwgY29zdAEAAQEQAAIAAQpTdGF0aXN0aWNzAwEBAP8BAQEBAQABAQEABAAAAAEBAQEBAAEBAQAEAAAAAYgAAhgAEGluY3JlbWVudGFsIGNvc3QAAC8BAAIAAgCsALYAAQECAYAUrkfhenQ/AADXo3A9CtfvPwAABQABAQEAAQEBAA==	1	0	0		>75%	<25%	>90%																					344862	6	1	FALSE	TRUE	0	FALSE	#NAME?
46.2033	TRUE	0	1	GF1_rK0qDwEAEACvAAwjACYAOgBEAFgAWQBnAHUAiQCrAKUAKgD//wAAAAAAAQQAAAAABjAuMDAwMAAAAAEESUNFUgEAAQEQAAIAAQpTdGF0aXN0aWNzAwEBAP8BAQEBAQABAQEABAAAAAEBAQEBAAEBAQAEAAAAAXkAAgwABElDRVIAAC8BAAIAAgCRAJsAAQECAYAUrkfhenQ/AADXo3A9CtfvPwAABQABAQEAAQEBAA==	1	0	0		>75%	<25%	>90%																					46.2033	7	1	FALSE	TRUE	0	FALSE	#NAME?
10871.6	TRUE	0	1	GF1_rK0qDwEAEADEAAwjACYANQBMAGAAYQBvAH0AngDAALoAKgD//wAAAAAAAQQAAAAAATAAAAABEWxvc3NlcyB0aHJvdWdoIE1JAQABARAAAgABClN0YXRpc3RpY3MDAQEA/wEBAQEBAAEBAQAEAAAAAQEBAQEAAQEBAAQAAAABgQACGQARbG9zc2VzIHRocm91Z2ggTUkAAC8BAAIAAgCmALAAAQECAYAUrkfhenQ/AADXo3A9CtfvPwAABQABAQEAAQEBAA==	1	0	0		>75%	<25%	>90%																					10871.6	12	1	FALSE	TRUE	0	FALSE	#NAME?
0
FALSE	15680	7345	3075	810
FALSE	15680	7345	13120	0
FALSE	15680	7345	13120	0
FALSE	15680	7345	13120	0
FALSE	15680	7345	13120	0
0
0	FALSE	FALSE	10	0.95	1

## Sheet: Input Results
	@RISK Input Results
	Performed By: Windows User
	Date: 13 December 2018 17:21:23
			Name	Worksheet	Cell	Graph	Min	Mean	Max	0.05	0.95	Errors
	Sup_Mat2_FCRA_131218.xlsx
		Category: <none>
			truncated infective events avoided	MODEL	B192		4781.6	15963.1	22135	10191	20634.7	0
			daily weight gain mutua 2012	costs	G3		80.7793	123.391	175.381	94.0155	155.437	0
			probability pig is slaughtered informally	Formal vs Informal Slaughter	F3		0.0022912	0.0601903	0.170732	0.014374	0.119854	0
			Risk of untreated pig being infected at formal slaughter	Prevalence of Cysticercosis	B3		0.244081	0.375929	0.509403	0.290155	0.461356	0
			Risk of pig being infected at informal slaughter	Prevalence of Cysticercosis	B6		0.244468	0.375897	0.506981	0.290847	0.461367	0
			mean number of cysts/ meal (light)	Level of Infection	E10		0.00443174	0.112447	0.219969	0.0153703	0.209241	0
			mean number of cysts/ meal (Mod)	Level of Infection	E11		0.226704	0.335676	0.444395	0.237607	0.433225	0
			mean number of cysts/ meal (Heavy)	Level of Infection	E12		0.44892	0.725429	0.999879	0.476026	0.971464	0
			mean number of cysts/ meal (v.Heavy)	Level of Infection	E13		1	1	1	1	1	0
			Probability any one cysticercus is viable	Level of Infection	E17		0.0100461	0.504172	0.999911	0.0596287	0.948958	0
			Daily	Pork Eating Behaviour	B4		0.404046	0.766095	1.33305	0.494747	1.09069	0
			Weekly	Pork Eating Behaviour	C4		14.3986	16.332	18.4515	15.044	17.6394	0
			Monthly	Pork Eating Behaviour	D4		35.5885	38.205	40.8041	36.5415	39.8754	0
			Yearly	Pork Eating Behaviour	E4		14.4857	16.4338	18.5444	15.1407	17.7574	0
			sp. Occasions	Pork Eating Behaviour	F4		3.51729	4.62819	5.82749	3.89663	5.39207	0
			Risk of pork meal being undercooked	Pork Eating Behaviour	I13		0.050994	0.0708904	0.0901268	0.0581157	0.0835726	0
			killout weight pig (g)	Pork Eating Behaviour	L20		18052.2	24346.8	36575.8	19361.4	30766.7	0
		Category: ADWG
			ADWG / g	pig weight	B3		81.8992	108.273	129.373	92.2727	122.99	0
		Category: global cost per MI
			global cost per MI / cost $	costs	B73		6419.85	7049.83	7841.32	6610.21	7531.91	0
		Category: pig infected/detected at meat inspection
			pig infected/detected at meat inspection / probability	Intervention Parameters	B2		0.103879	0.424134	0.8615	0.195902	0.683306	0
		Category: pig is heavily infected
			pig is heavily infected / probability	Level of Infection	C4		0.142434	0.395762	0.676916	0.227459	0.57034	0
			pig is heavily infected / cysts/pig	Level of Infection	D4		101.033	301.017	499.942	121.185	479.767	0
		Category: pig is lightly infected
			pig is lightly infected / probability	Level of Infection	C2		0.216931	0.485323	0.75598	0.310738	0.660726	0
			pig is lightly infected / cysts/pig	Level of Infection	D2		1.00923	25.3432	49.9978	3.42905	47.5177	0
		Category: pig is moderately infected
			pig is moderately infected / probability	Level of Infection	C3		0.00166965	0.0983692	0.308016	0.0199577	0.20454	0
			pig is moderately infected / cysts/pig	Level of Infection	D3		51.0062	75.5609	99.9983	53.4977	97.4511	0
		Category: pig uninfected/escapes detection at meat inspection
			pig uninfected/escapes detection at meat inspection / probability	Intervention Parameters	B5		0.91326	0.983317	0.999997	0.954545	0.998977	0
		Category: Probability of treated pig being uninfected
			Probability of treated pig being uninfected / probability	Intervention Parameters	B10		0.991644	0.99833	1	0.995451	0.999898	0
		Category: Probability of treatment
			Probability of treatment / probability	Intervention Parameters	B8		0.700014	0.749907	0.799995	0.704942	0.794925	0
		Category: probabily pig is v.heavily infected
			probabily pig is v.heavily infected / probability	Level of Infection	C5		0.00146833	0.0987381	0.301072	0.0196996	0.204794	0
			probabily pig is v.heavily infected / cysts/pig	Level of Infection	D5		509.12	40429.5	80337.9	4359.73	76347.9	0
		Category: Travel to pig
			Travel to pig / daily weight gain mutua 2012	costs	G12		0.090496	0.115054	0.139813	0.0966564	0.133309	0
	Supplementary_material_1_risk_analysis_model_@risk_Baseline.xlsx
		Category: <none>
			probability pig is slaughtered informally	Formal vs Informal Slaughter	F3		0.0027446	0.0602126	0.175395	0.0143185	0.119694	0
			Risk of pig being infected at formal slaughter	Prevalence of Cysticercosis	B3		0.242478	0.37581	0.508679	0.290261	0.461357	0
			Risk of pig being infected at informal slaughter	Prevalence of Cysticercosis	B6		0.242809	0.375707	0.506633	0.2905	0.460717	0
			mean number of cysts/ meal (light)	Level of Infection	E10		0.00440903	0.112515	0.219969	0.0153412	0.209283	0
			mean number of cysts/ meal (Mod)	Level of Infection	E11		0.226726	0.335805	0.444371	0.237803	0.433652	0
			mean number of cysts/ meal (Heavy)	Level of Infection	E12		0.449003	0.724645	0.999947	0.475559	0.972545	0
			mean number of cysts/ meal (v.Heavy)	Level of Infection	E13		1	1	1	1	1	0
			Probability any one cysticercus is viable	Level of Infection	E17		0.0100578	0.502862	0.999887	0.0587353	0.950448	0
			Risk of pork meal being undercooked	Pork Eating Behaviour	I13		0.0511179	0.0708291	0.0901104	0.05804	0.0835053	0
		Category: pig infected/detected at meat inspection
			pig infected/detected at meat inspection / probability	Intervention Parameters	B2		8.17094e-07	0.0113555	0.0579955	0.000684175	0.0303847	0
		Category: pig is heavily infected
			pig is heavily infected / probability	Level of Infection	C4		0.150816	0.395975	0.675986	0.227284	0.570349	0
			pig is heavily infected / cysts/pig	Level of Infection	D4		101.076	300.497	499.967	121.133	479.996	0
		Category: pig is lightly infected
			pig is lightly infected / probability	Level of Infection	C2		0.217862	0.485232	0.758337	0.310338	0.660521	0
			pig is lightly infected / cysts/pig	Level of Infection	D2		1.00459	25.4301	49.999	3.49081	47.5493	0
		Category: pig is moderately infected
			pig is moderately infected / probability	Level of Infection	C3		0.00117387	0.0985802	0.300156	0.0198509	0.205554	0
			pig is moderately infected / cysts/pig	Level of Infection	D3		51.0037	75.5331	99.9934	53.4855	97.6346	0
		Category: pig uninfected/detected at meat inspection
			pig uninfected/detected at meat inspection / probability	Intervention Parameters	B4		5.74208e-07	0.00795667	0.0422338	0.00049971	0.0215025	0
		Category: probabily pig is v.heavily infected
			probabily pig is v.heavily infected / probability	Level of Infection	C5		0.00116061	0.0986043	0.30813	0.0197481	0.203639	0
			probabily pig is v.heavily infected / cysts/pig	Level of Infection	D5		510.525	40280.6	80314.6	4663.36	76352.2	0

## Sheet: Output Results
	@RISK Output Results
	Performed By: Windows User
	Date: 13 December 2018 17:21:37
		Status	Name	Worksheet	Cell	Graph	Min	Mean	Max	0.05	0.95	Errors
	Sup_Mat1_FCRA_131218.xlsx
		OK	Risk that pork meal is infective after cooking	MODEL	B186		1.30908e-05	0.00118715	0.00526562	0.000120447	0.00272703	0
		OK	number of potentially infective pork meals taken per year	MODEL	B190		51.1651	4936.04	24943.7	498.863	11750.3	0
		OK	potentially infective events avoided from baseline	MODEL	B191		-2661.73	17346	22230.8	10528.8	21782.8	0
		OK	loss condemned pigs	MODEL	B194		12990.1	64098.2	162000	29438.7	106525	0
		OK	total cost treated pigs	MODEL	B196		14512.2	17324.8	19929.8	15780.5	18853.2	0
		OK	incremental cost	MODEL	B204		178999	239954	352102	202853	284157	0
		OK	ICER	MODEL	B206		8.95802	15.7865	56.5258	10.9189	24.0653	0
	Supplementary_material_1_risk_analysis_model_@risk_Baseline.xlsx
		OK	Risk that pork meal is infective before cooking	MODEL	B88		0.000974392	0.0819057	0.303816	0.00913258	0.173631	0
		OK	Risk that pork meal is infective after cooking	MODEL	B90		6.23091e-05	0.00579806	0.0215443	0.000625334	0.0124893	0
		OK	number of potentially infective pork meals taken per year	MODEL	B93		239.061	22245.4	82659.2	2399.22	47917.8	0
		OK		MODEL	B95		0.0724692	1397.37	13053.8	50.7251	4479.42	0
		OK	losses through MI	MODEL	B97		86.3958	10653.4	39415.4	2157.98	23212.6	0

## Sheet: Stat Functions Results
@RISK Statistic Functions Results
Performed By: Windows User
Date: 13 December 2018 17:21:43
No statistic functions information available.
